# Supplementary material for: Mesoporous silicon oxynitride thin films
Source: Royal Society of Chemistry journal article supplement (doi:10.1039/b513854j), 2006-01-01
Supplement: b513854j.pdf [file b513854j.pdf]

# Mesoporous Silicon Oxynitride Thin Films

Jiacheng Wang,<sup>a,b</sup> and Qian Liu\*<sup>a</sup>

*<sup>a</sup> State key Laboratory of High Performance Ceramics and Superfine  
Microstructure, Shanghai Institute of Ceramics, 1295 Dingxi Road,  
Shanghai 200050 P. R. China.*

*<sup>b</sup> Graduate School of the Chinese Academy of Sciences, 19A Yuquan Road,  
Beijing 100039 P. R. China*

\*Correspondence should be addressed to Prof. Qian Liu (E-mail:  
qianliu@sunm.shcnc.ac.cn).

## Experimental section

**Synthesis:** Mesoporous silicon oxynitride thin films (MSONTFs) were prepared as following by two steps. Firstly, mesoporous silica thin films (MSTFs) were synthesized by dip-coating. Specifically, 7.7 mL of tetraethyl orthosilicate (TEOS) were prehydrolyzed in a solution containing 3.7 g of dilute hydrochloric acid ( $\text{pH} \approx 2$ ) to 10 mL of tetrahydrofuran (THF) under vigorous stirring at room temperature. Following 2 h of stirring, this prehydrolyzed silica solution was mixed with a solution containing 1.8 g of the block copolymer  $\text{EO}_{20}\text{PO}_{70}\text{EO}_{20}$  (Pluronic P123, BASF Corporation) dissolved in 30 mL of THF. Then, the solution was stirred for 15 min, after which films were prepared by dip-coating (at a speed of 70~75 mm/min) onto the carefully cleaned quartz substrates. Then, the as-synthesized MSTFs were stored in an ambient atmosphere for 24 h.

Secondly, MSONTFs were prepared by heating the as-synthesized MSTFs in flowing ammonia of  $400 \text{ mL min}^{-1}$  in a quartz tube furnace. The quartz tube was evacuated several times and flushed with  $\text{N}_2$  to remove air before the run was started. The precursors were heated at  $5 \text{ }^\circ\text{C min}^{-1}$  to the final temperatures ( $T = 900, 950, 1000, 1050 \text{ }^\circ\text{C}$ ) and then held for 12 h. After cooling, the products were purged with  $\text{N}_2$  for several minutes. According to the treatment temperatures, we defined the ordered MSONTFs as MSONTFs-T. For example, MSONTFs-1000 means the MSTFs was treated at  $1000 \text{ }^\circ\text{C}$ .

### Characterization:

X-ray powder diffraction patterns were collected on a Rigaku D/ MAX-c  $\beta$  instrument using  $\text{CuK}\alpha$  ( $\lambda = 0.15406 \text{ nm}$ ) radiation at 40 kV and 60 mA.

High-resolution transmission electron microscope (HRTEM) image was obtained using a JEOL 2010CX TEM.

Infrared spectroscopic investigation of the samples at room temperature was carried out on a Bruker Vector 22 spectrometer using the KBr pellet method. IR spectrum of a dehydrated material (the MSONTFs) was recorded using a Nexus-470 FTIR

# Supplementary Material (ESI) for Chemical Communications  
# This journal is (c) The Royal Society of Chemistry 2006

spectrometer (made in NICOLE Company, USA) on self-supporting wafers in a glass vacuum IR cell. Prior to the collection of spectrum, the sample was heated in the cell for 4 hours at 300 °C.

X-ray photoelectron spectroscopy data were obtained with an ESCALab220i-XL electron spectrometer from VG Scientific using 300W AlK $\alpha$  radiation. The binding energies were referenced to the C1s line at 284.8 eV from adventitious carbon.
